# Supplementary material for: A functional comparison of the domestic cat bitter receptors Tas2r38 and Tas2r43 with their human orthologs
Source: PubMed Central journal article supplement (PMC4453034; doi:10.1186/s12868-015-0170-6), 2015-06-03
Supplement: 12868_2015_170_MOESM1_ESM.pdf [file 12868_2015_170_MOESM1_ESM.pdf]

Supplementary  
Figure 1

A.

|        |                 |                   |                  |                |                  |                |
|--------|-----------------|-------------------|------------------|----------------|------------------|----------------|
|        | 10              | 20                | 30               | 40             | 50               |                |
| cT2r38 | MLALTPVI        | TVSYEVKSAFLFLSI   | LEFTVGMLANAFI    | FLVNFWDVV      | RKQPL            | 50             |
| hT2R38 | MLTLTRIRTVSYEVR | RSTFLFLISVLEFAVGF | LTFNAFVFLVNFWDVV | KRQAL          |                  | 50             |
|        | 60              | 70                | 80               | 90             | 100              |                |
| cT2r38 | SNQDLILL        | SLSLTRLFLHGLLFL   | DALQLTYFQRMKDPL  | SLSYQTI        | I MLVM           | 100            |
| hT2R38 | SNSDCVLL        | CLSI SRLFLHGLLFL  | SALQLTHFQKLESEPL | NHYSQAI        | I MLVM           | 100            |
|        | 110             | 120               | 130              | 140            | 150              |                |
| cT2r38 | I               | TNQVGLWLT         | CLSLLYCSKI       | ARFSHTLL       | HCVASWWSRKVPQMLL | GAMLF          |
| hT2R38 | I               | ANQANLWLAACL      | SLLYCSKLI        | RFSHTFL        | CLASWWSRKISQMLL  | GLILC          |
|        | 160             | 170               | 180              | 190            | 200              |                |
| cT2r38 | SCI             | CTAI              | CLGDFFSRSGFT     | FTT            | MLFVNNTEFN       | LQIAKLSFYHSFI  |
| hT2R38 | SCI             | CTVLCVWCF         | FSRPHFT          | MTT            | MLFMNNTRL        | NWQIKDLNLFYSFL |
|        | 210             | 220               | 230              | 240            | 250              |                |
| cT2r38 | ASI             | PSSLF             | FLISSGVL         | I              | VSLGRHMRTMRAKT   | KDSHDPSLEAHI   |
| hT2R38 | WSVPPF          | LLFLVSSGML        | T                | VSLGRHMRTMKVYT | RNSRDPSLEAHI     | KALKSLV        |
|        | 260             | 270               | 280              | 290            | 300              |                |
| cT2r38 | SF              | LCLYVVSFCAAL      | VSVP             | LLMLWHNKI      | GVM              | CVGILAACPSI    |
| hT2R38 | SF              | FCFFVLISSCMAFI    | SVPL             | LLLWRDKI       | GVM              | CVGIMAACPSG    |
|        | 310             | 320               | 330              |                |                  |                |
| cT2r38 | NAKL            | RAVETI            | LLWQNSL          | KI             | GADHKADART       | PGLC           |
| hT2R38 | NAKL            | RAVMTI            | LLWQSSL          | KVRADHKADSRT   | -                | LC             |

B.

|        |          |              |       |            |         |                 |
|--------|----------|--------------|-------|------------|---------|-----------------|
|        | 10       | 20           | 30    | 40         | 50      |                 |
| cT2r43 | MVTALPSI | FSI          | VVI   | I          | EFL     | LGNFANGFI       |
| hT2R43 | M        | TFLPI        | I     | FSS        | L       | VVVTFVIGNFANGFI |
|        | 60       | 70           | 80    | 90         | 100     |                 |
| cT2r43 | LAVSRI   | GLL          | WLI   | LI         | NWYATL  | FSPDFYSL        |
| hT2R43 | LAVSR    | VGLL         | WLL   | LI         | NWYST   | VLNPAFNS        |
|        | 110      | 120          | 130   | 140        | 150     |                 |
| cT2r43 | SLSI     | FYL          | FKI   | ANFSS      | LI      | FLRLKWRVKS      |
| hT2R43 | TLSI     | FYL          | LKI   | ANFSN      | FI      | FLHLKRRVKS      |
|        | 160      | 170          | 180   | 190        | 200     |                 |
| cT2r43 | EKVQT    | DVYEGNGTR    | KTKL  | RDI        | LQLSNMT | IFTLANFI        |
| hT2R43 | E        | IVRTKEFEGNMT | WKIKL | KSAMYFSNMT | VTMVAN  | LPFTLTL         |
|        | 210      | 220          | 230   | 240        | 250     |                 |
| cT2r43 | SL       | WKHLK        | RMQL  | CDKGSQDP   | STKVHI  | RAMQTV          |
| hT2R43 | SL       | CKHLK        | KMQL  | HGKGSQDP   | STKVHI  | KALQTV          |
|        | 260      | 270          | 280   | 290        | 300     |                 |
| cT2r43 | SSNWP    | QNEFG        | FLL   | CQVI       | GI      | LYPSI           |
| hT2R43 | SF       | GSE          | ENKPV | FMFCKAI    | RFSYPSI | HPFILI          |
|        |          |              |       |            |         |                 |
| cT2r43 |          |              |       |            |         |                 |
| hT2R43 | V        | KGEKTSSP     |       |            |         |                 |

300  
309

## Supplementary Figure 1

**Supplementary Figure 1. Cats encode predicted protein orthologs to human bitter taste receptors 38 and 43.** Sequences of human bitter taste receptors TAS2R38 and TAS2R43 were used to identify cat genes that were predicted to encode orthologous proteins. **(A)** Alignment of predicted cat Tas2r38 (cT2r38) with human TAS2R38 (hT2R38). **(B)** Alignment of predicted cat Tas2r43 (cT2r43) with human TAS2R43 (hT2R43).
