# Supplementary material for: A functional comparison of the domestic cat bitter receptors Tas2r38 and Tas2r43 with their human orthologs
Source: Springer Nature journal article supplement (doi:10.1186/s12868-015-0170-6), 2015-05-27
Supplement: 12868_2015_170_MOESM2_ESM.pdf [file 12868_2015_170_MOESM2_ESM.pdf]

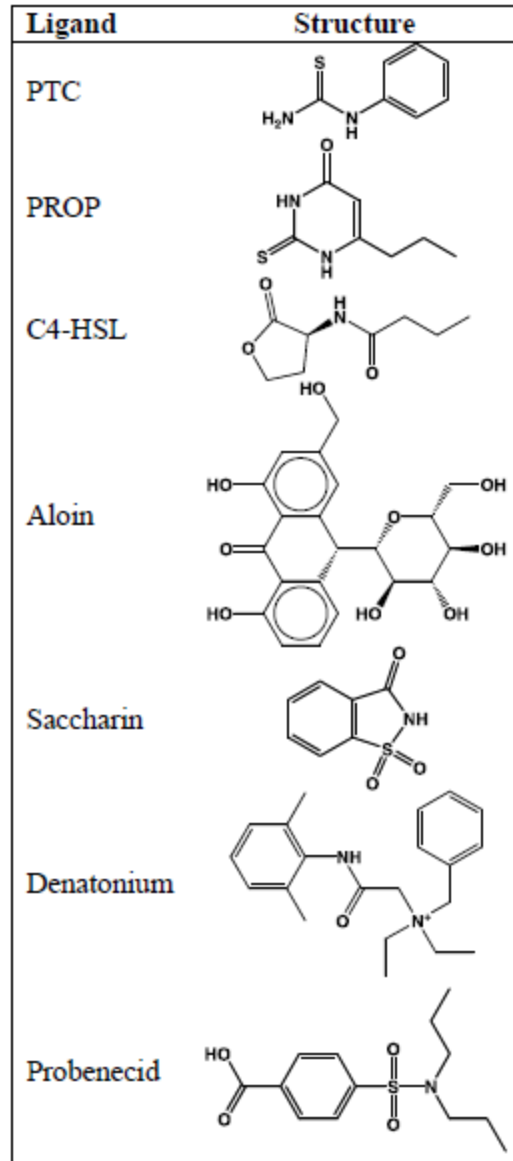

**Figure 2. Ligands used to deorphan cat Tas2r38 and Tas2r43.** The receptors were tested for their responses to known ligands for human TAS2R38 (phenylthiocarbamide (PTC ), 6-n-propylthiouracil (PROP), and C4-HSL (N-butyl-L-homoserine lactone), TAS2R43 (aloin, denatonium, and saccharin), and for effects of probenecid, an inhibitor of some TAS2R receptors [12].
