# Supplementary material for: A functional comparison of the domestic cat bitter receptors Tas2r38 and Tas2r43 with their human orthologs
Source: Springer Nature journal article supplement (doi:10.1186/s12868-015-0170-6), 2015-05-27
Supplement: 12868_2015_170_MOESM3_ESM.pdf [file 12868_2015_170_MOESM3_ESM.pdf]

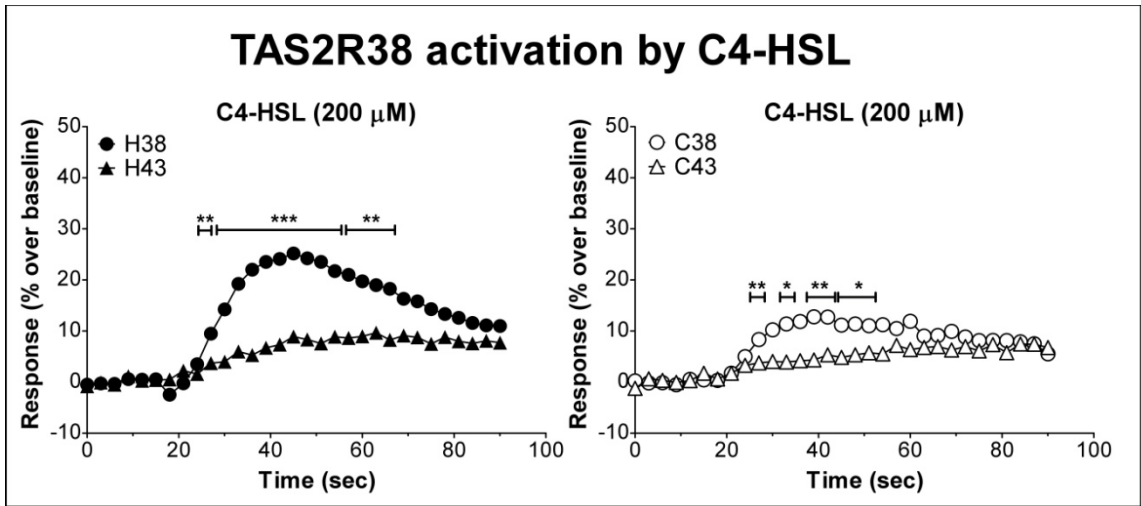

**Supplementary Figure 3. C4-HSL activation of human TAS2R38 is statistically significant when compared to the human TAS2R43 response.** Each point represents the average of 4 replicate measurements. For each time point the 4 baseline-corrected values for TAS2R38 and TAS2R43 were compared by unpaired, two tailed t-test. Significant differences are indicated by bars, with indicated P values (\* < 0.05, \*\* < 0.01, \*\*\* < 0.001).
